# Supplementary material
Source: publisher figshare collection journal article supplement (https://geolsoc.figshare.com/ndownloader/files/22730921)

## APPENDIX C: CATHODOLUMINESCENCE IMAGES OF ZIRCONS & ABLATION TARGETS

---

**Figure C-1.** Sample LP-16: CL images of zircons with ablation locations. Note: diameter of red circle is 24  $\mu\text{m}$ .

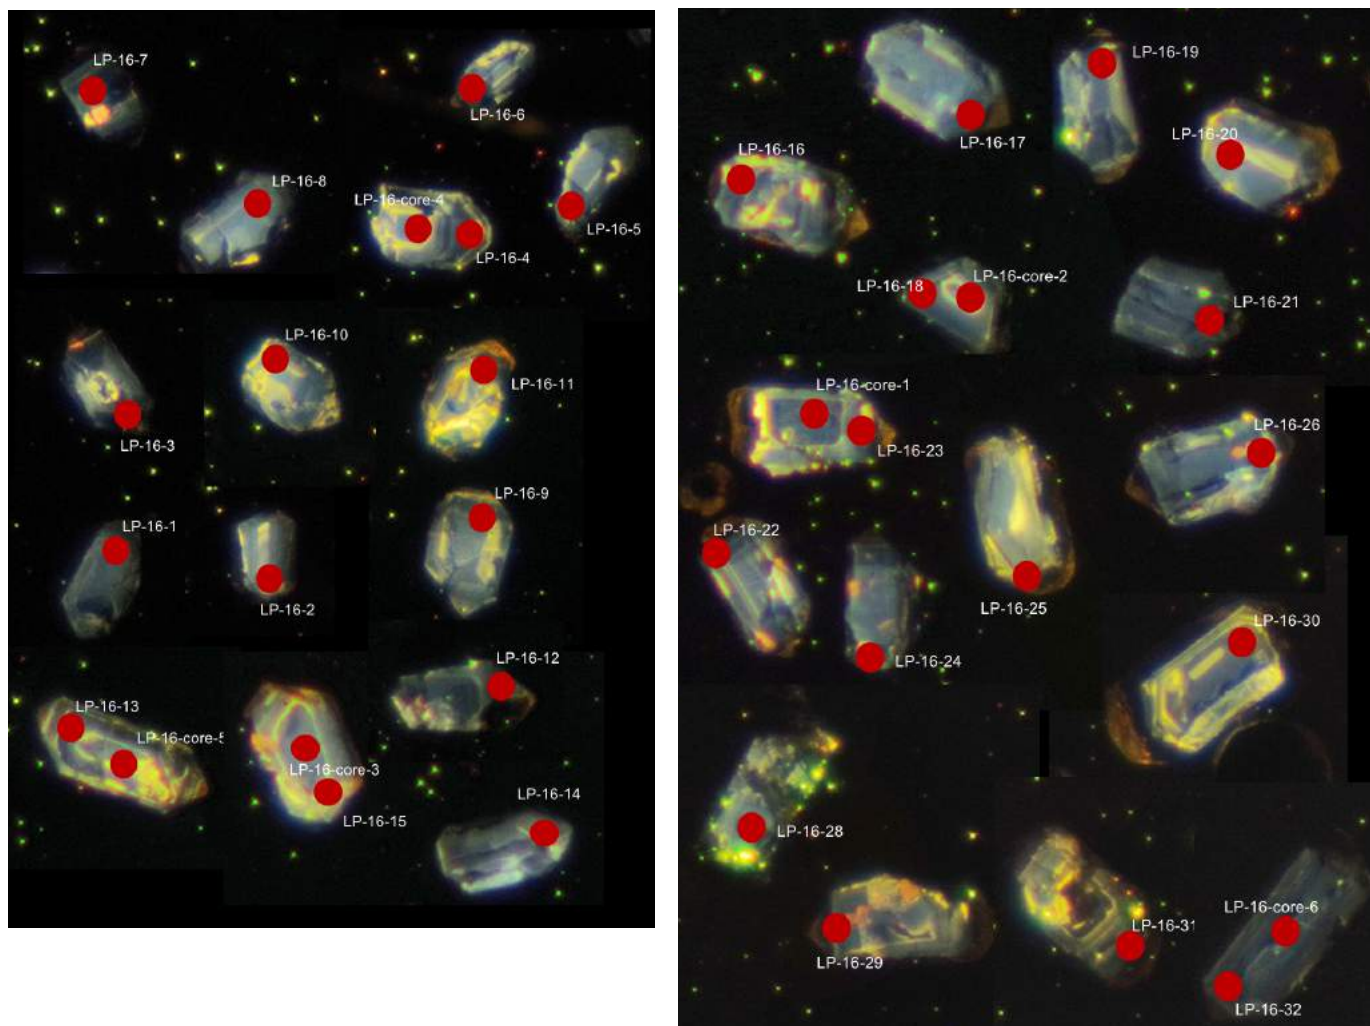

**Figure C-2.** Sample LP-32: CL images of zircons with ablation locations. Note: diameter of red circle is 24  $\mu\text{m}$

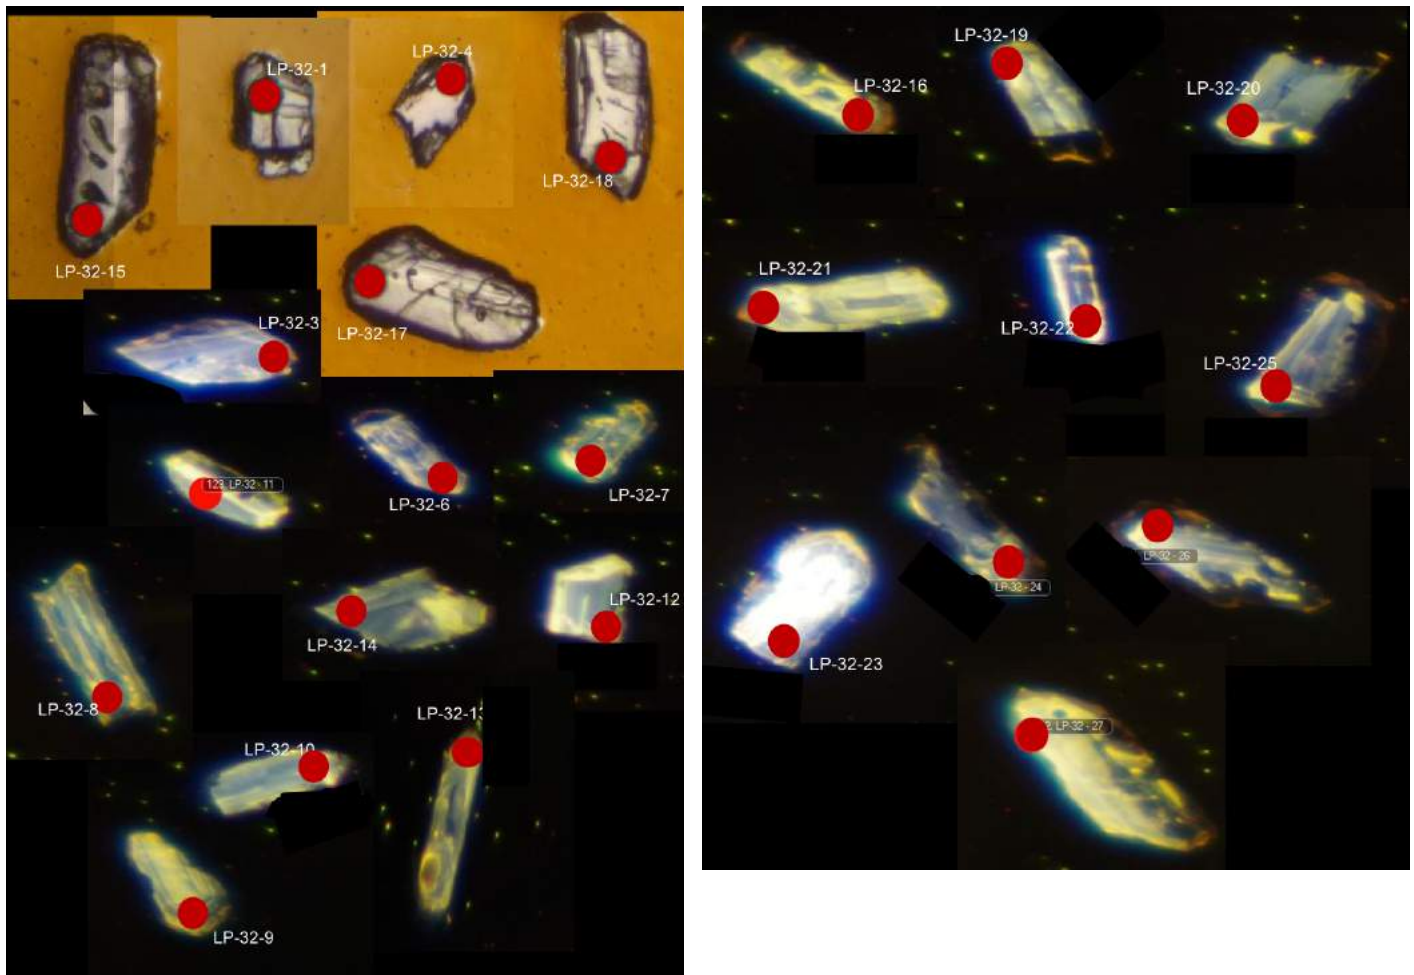

**Figure C-3.** Sample LP-33: CL images of zircons with ablation locations. Note: diameter of red circle is 24  $\mu\text{m}$

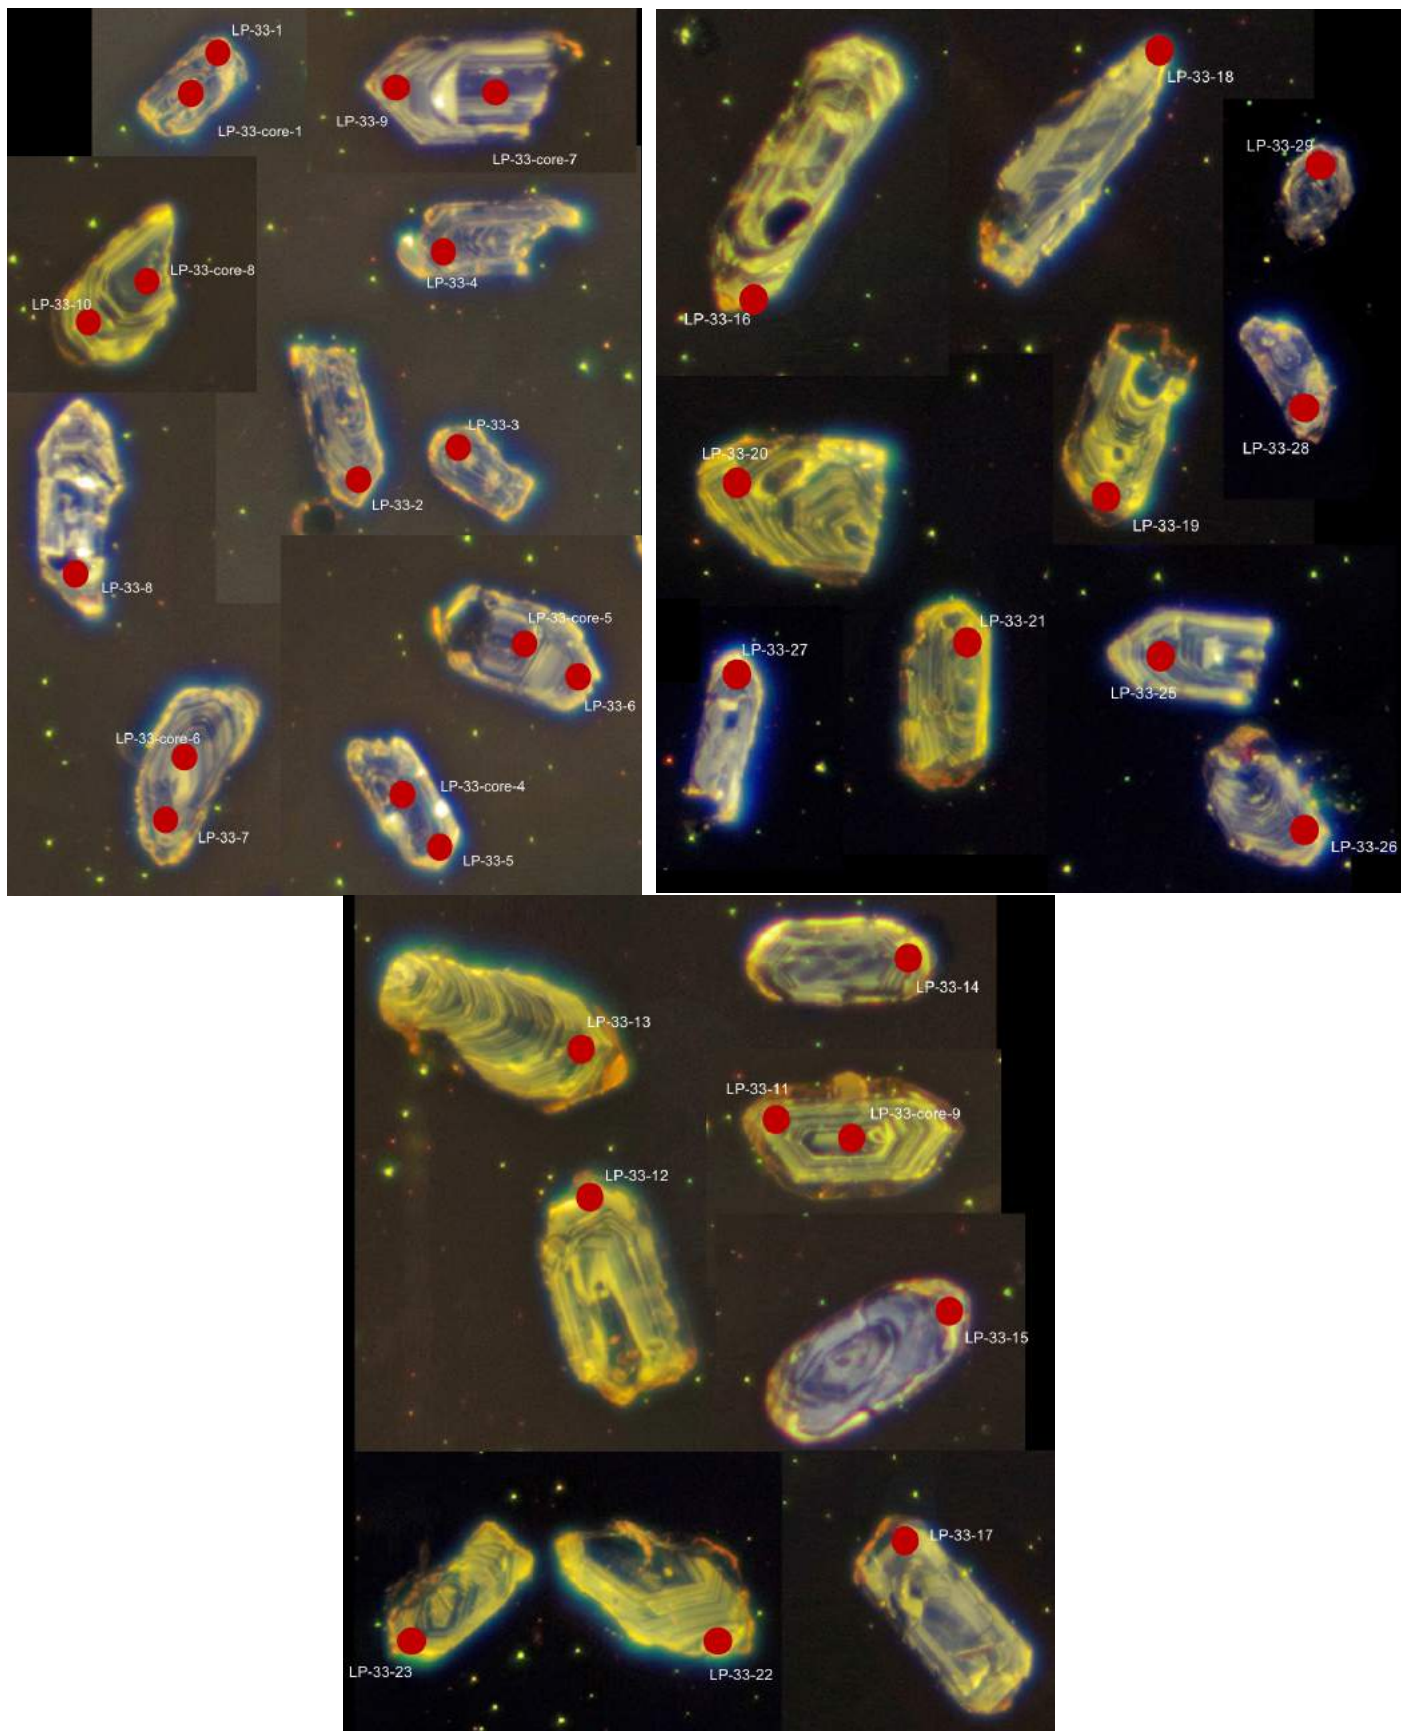

**Figure C-4.** Sample LP-39: CL images of zircons with ablation locations. Note: diameter of red circle is 24  $\mu\text{m}$

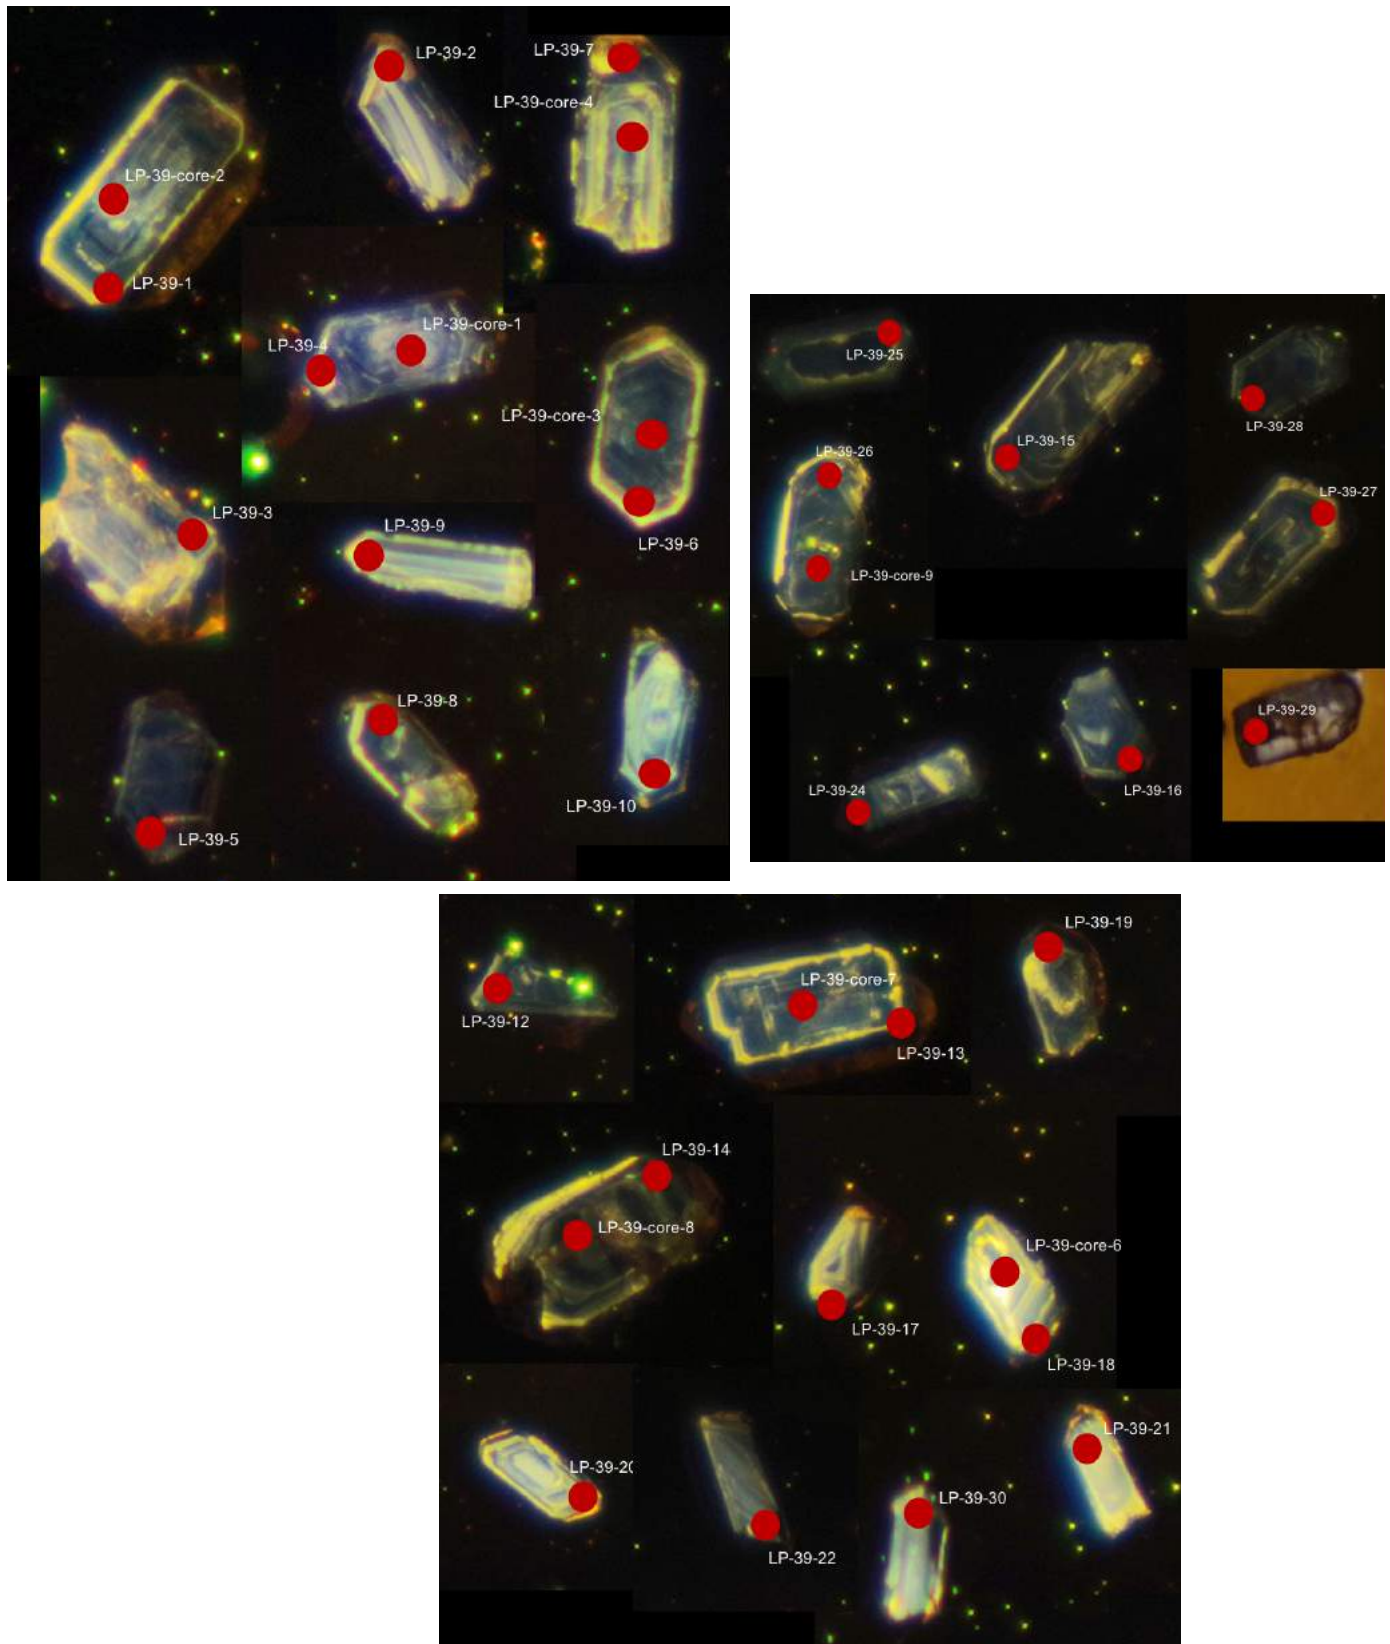

**Figure C-5.** Sample LP-40: CL images of zircons with ablation locations. Note: diameter of red circle is 24  $\mu\text{m}$

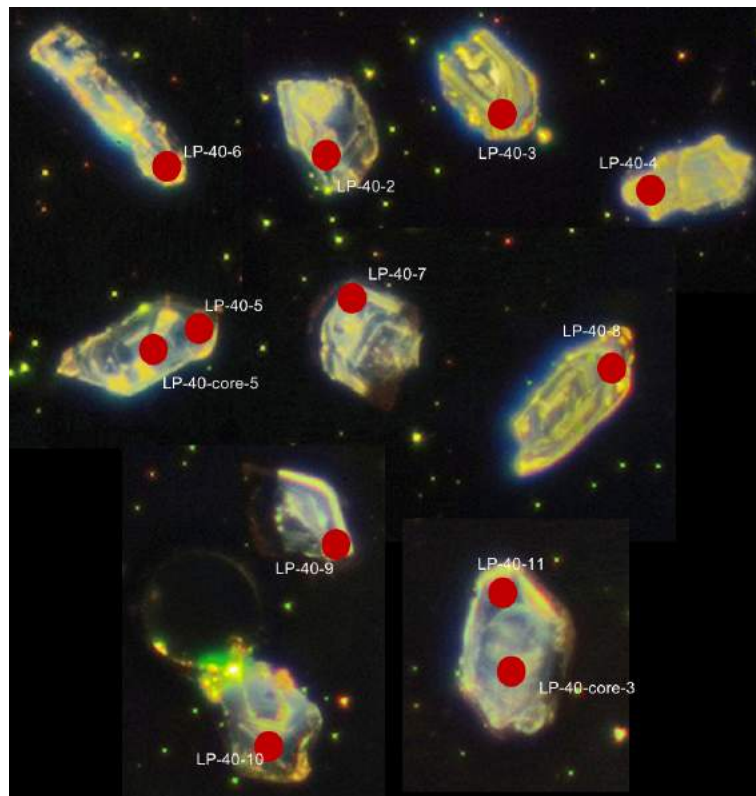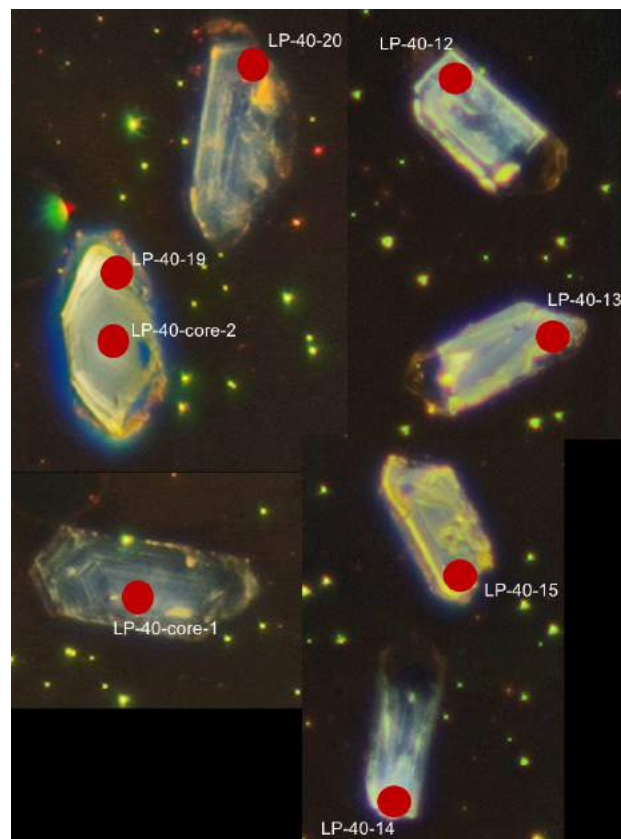

**Figure C-6.** Sample LP-44: CL images of zircons with ablation locations. Note: diameter of red circle is 24  $\mu\text{m}$

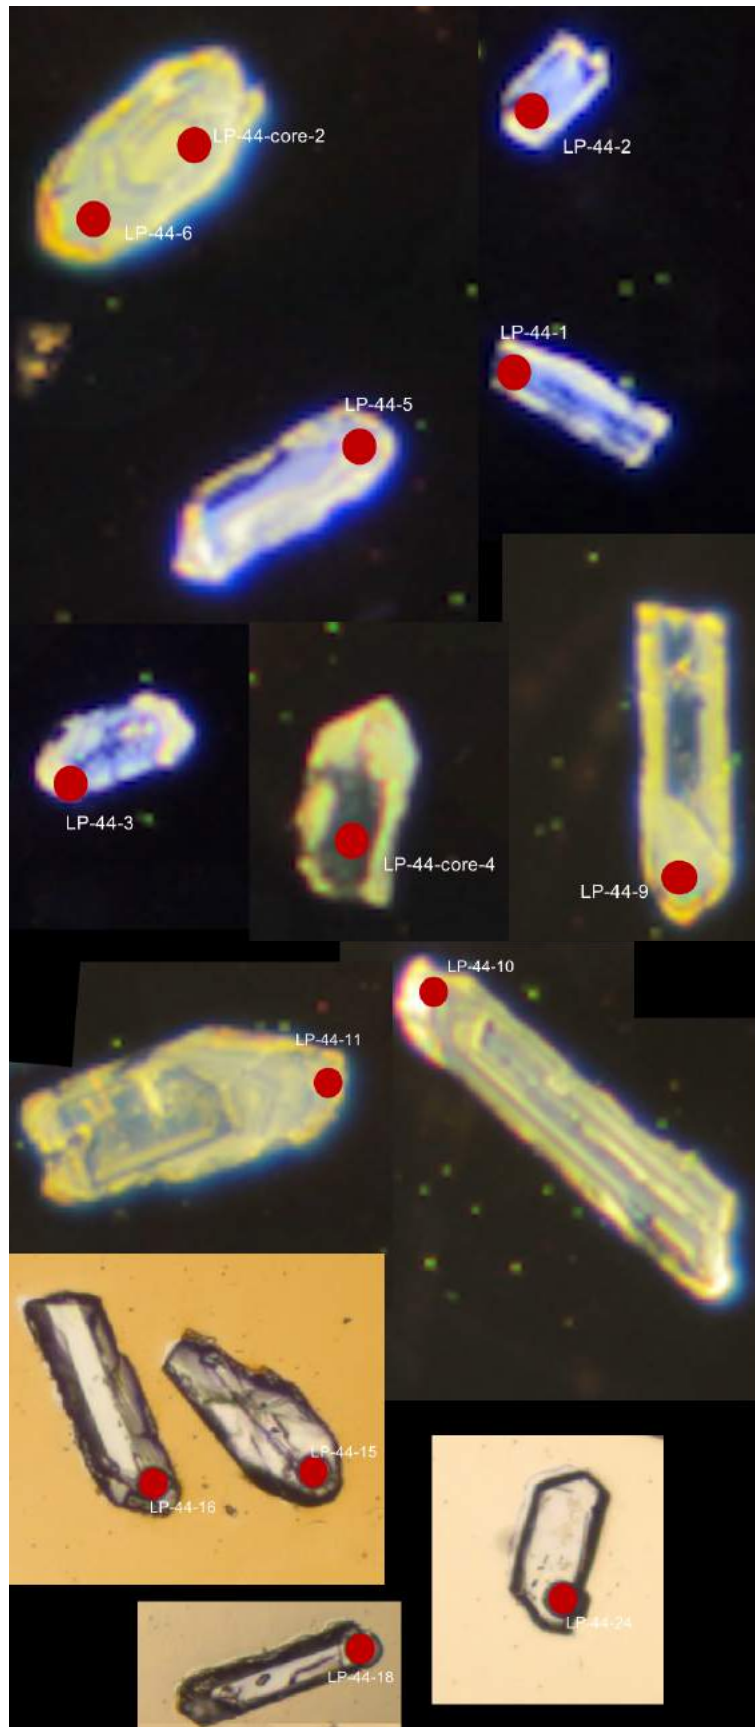

**Figure C-7.** Sample LP-53: CL images of zircons with ablation locations. Note: diameter of red circle is 24  $\mu\text{m}$

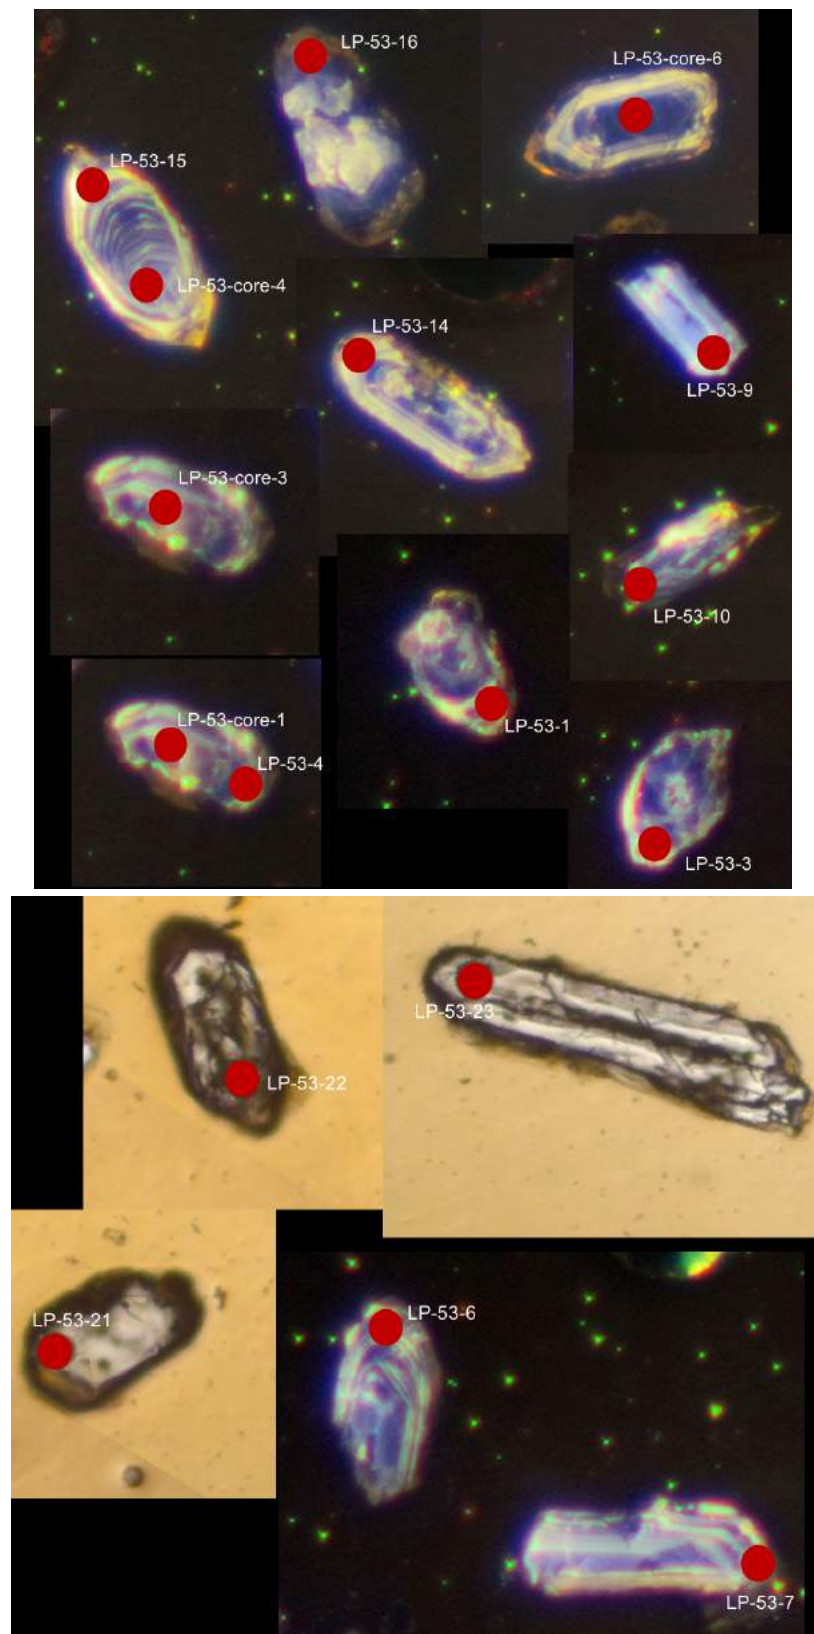

**Figure C-8.** Sample LP-59: CL images of zircons with ablation locations. Note: diameter of red circle is 24  $\mu\text{m}$

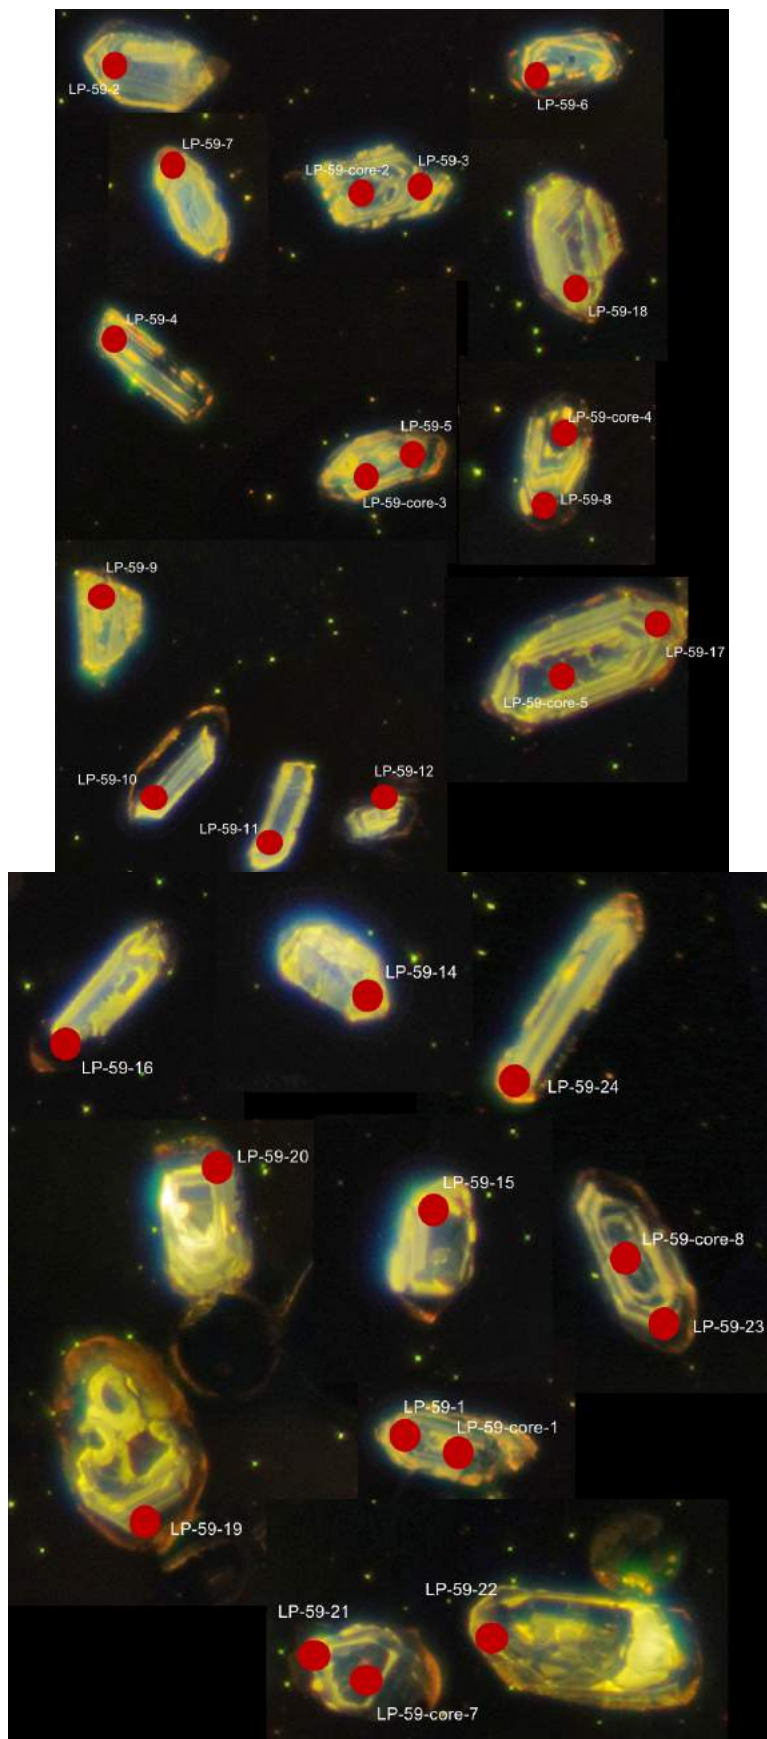

**Figure C-9.** Sample LP-66: CL images of zircons with ablation locations. Note: diameter of red circle is 24  $\mu\text{m}$

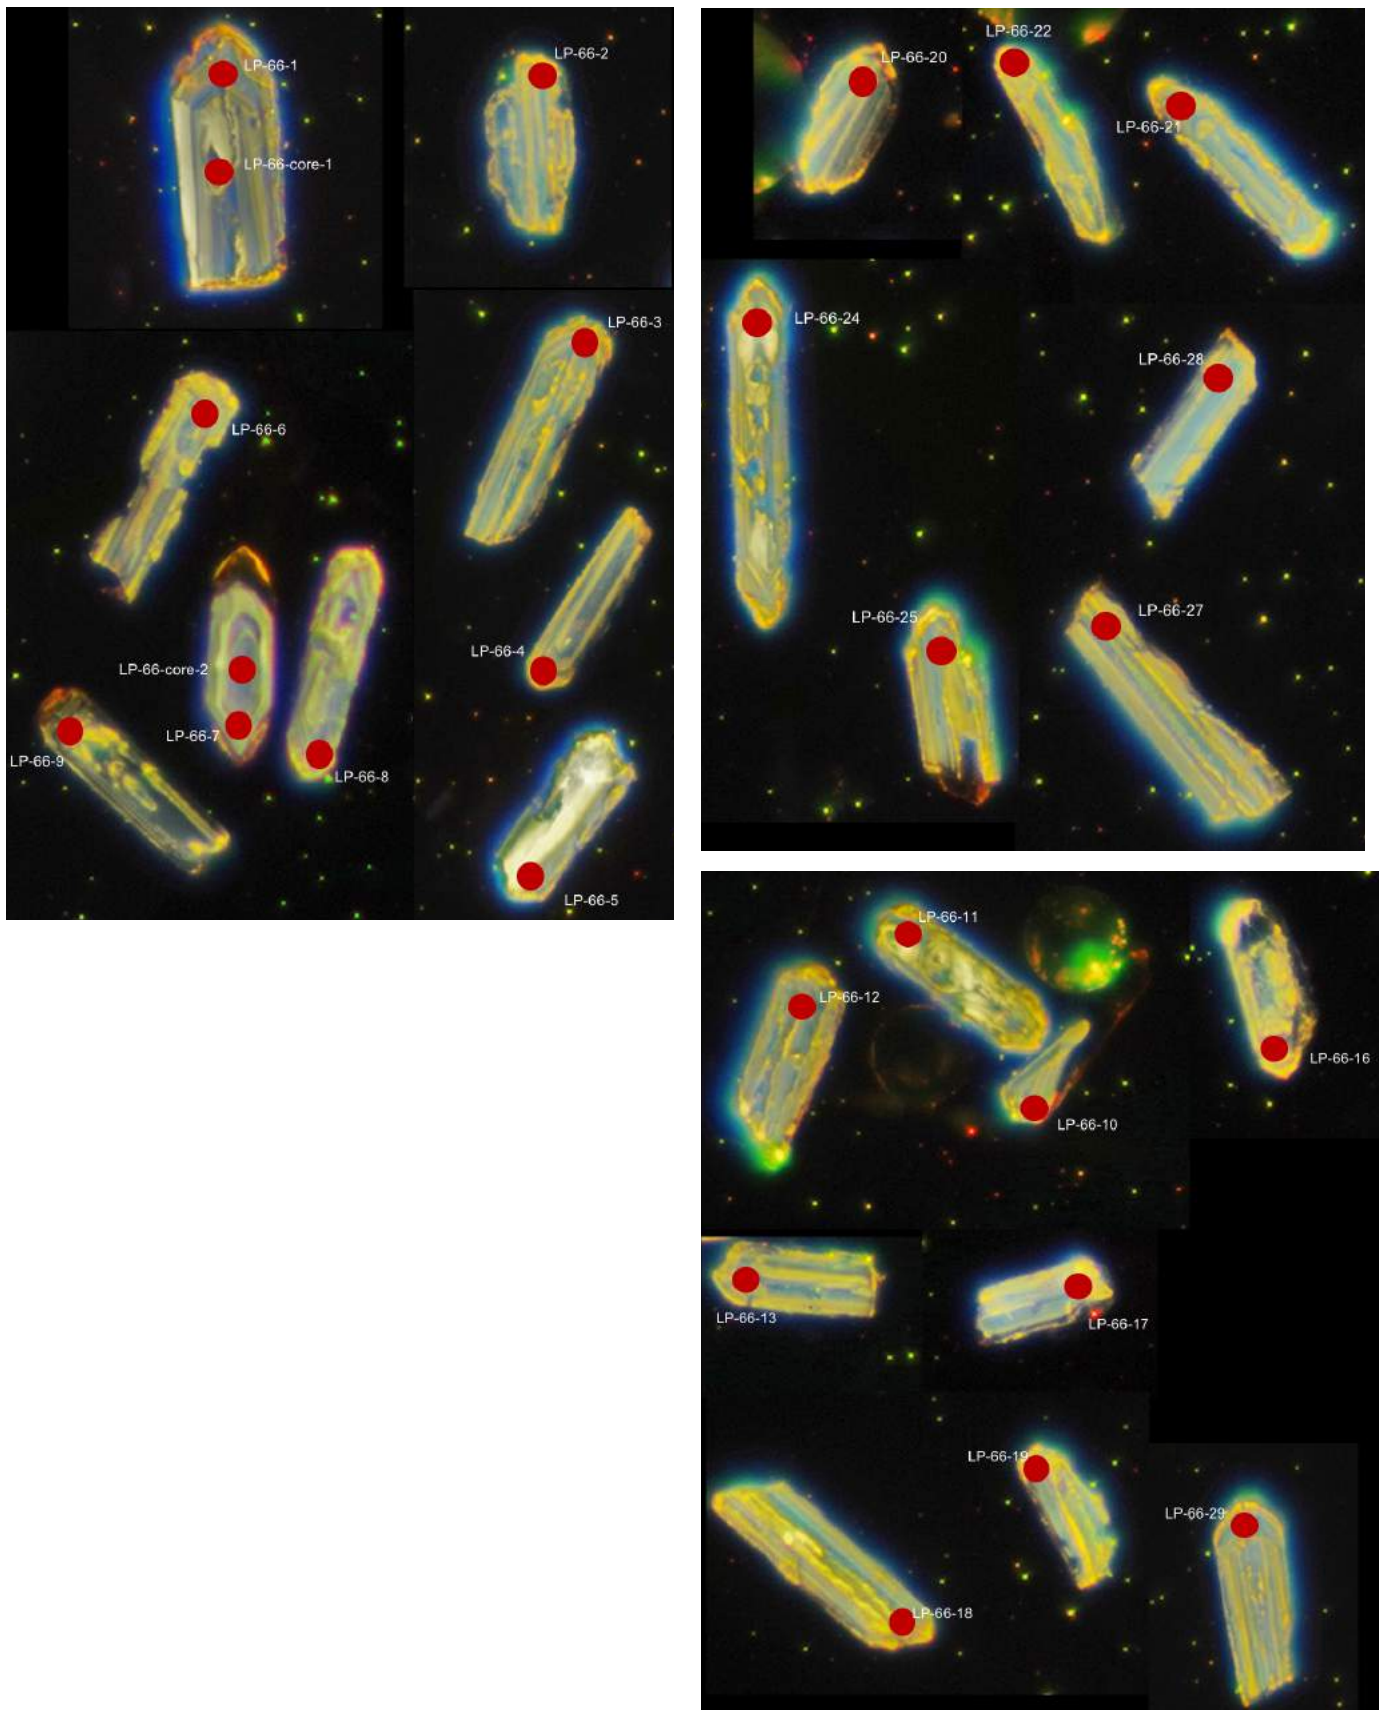

Supplement: Supplementary file 1 [file 22730921]
